# Supplementary material
Source: PubMed Central journal article supplement (PMC3158717)
Supplement: supp_blood-2010-12-326199_Document1.pdf [file supp_blood-2010-12-326199_Document1.pdf]

**Table S1. List of primers for semi-quantitative RT-PCR**

We performed semi-quantitative RT-PCR using the following primers.

**Figure S1. pME18Sneo-sHBZ activated TGF- $\beta$  signaling**

In 12-well plates, HepG2 cells were cotransfected with 3TP-Lux (0.5  $\mu$ g), phRL-TK (2 ng), and pME18Sneo-sHBZ (0, 2, 5, 10, 20, 50, 100, and 200 ng). At 24 hours post-transfection, the cells were treated with or without TGF- $\beta$  (10 ng/mL). After 24 hours, the cells were harvested and analyzed for luciferase activity.

**Figure S2. HBZ did not influence the Smad3/c-Ski interaction**

COS7 cells were cotransfected with mycHis-sHBZ (4  $\mu$ g), FLAG-Smad3 (4  $\mu$ g), and HA-c-Ski (4  $\mu$ g). Cell lysates were subjected to immunoprecipitation using anti-FLAG followed by immunoblotting using anti-HA.

**Figure S3. Expression of *Smad3* in ATL and HTLV-1 immortalized cell lines**

Semi-quantitative RT-PCR analysis of *Smad3* is shown in ATL and HTLV-1-immortalized cell lines. The expression of *GAPDH* is shown at the bottom as a control.

**Figure S4. HBZ did not influence STAT5 signaling**

In 12-well plates, 293T cells were cotransfected with pGL4-J $\gamma$ 1 (0.4  $\mu$ g), phRL-TK (1 ng), pCAGGS-WT-STAT5a (0.1  $\mu$ g), pCAGGS-CA-STAT5a (0.1  $\mu$ g), and pME18Sneo-sHBZ (0, 0.01, 0.03, 0.1 and 0.2  $\mu$ g). After 48 hours, the cells were harvested, and luciferase activity was determined.

| Human mRNA target | Primers                                        |
|-------------------|------------------------------------------------|
| <i>Smad3</i>      | F: aagggctccctcatgcat<br>R: ggattcgggataggttgg |
| <i>GAPDH</i>      | F: gcagggggagccaaaagg<br>R: tgccagcccagcgtcaag |

| Mouse mRNA target | Primers                                                  |
|-------------------|----------------------------------------------------------|
| <i>PDGFB</i>      | F: gattcgagttgaaagctcatctc<br>R: gatgtcccaggactctagtcaca |
| <i>SOX4</i>       | F: actggggtgtacgaagatgga<br>R: caatagccgggaattgaaagtgg   |
| <i>CDKN1A</i>     | F: tgattcgatgcgctcatgg<br>R: gaccaatctgcgcttggagt        |
| <i>CDKN2B</i>     | F: cagatcccaacgccctgaac<br>R: cctgcttccagccaagtctac      |
| <i>CTGF</i>       | F: cccaactatgatgcgagccaa<br>R: catcgggcatftgaactcca      |
| <i>FOXP3</i>      | F: ctacagtgccctagtcatggt<br>R: ttgccagcagtggttagga       |
| <i>RUNX1</i>      | F: caccgtttacaatccgccacaa<br>R: agccgttgagctcactggaaag   |
| <i>MYC</i>        | F: ttctcccaagggaagacgatg<br>R: tcgttgagcgggtaggaaa       |
| <i>TSC22D1</i>    | F: tctggtgcaagtgtgtagcta<br>R: ttgatcctgagccctgggat      |
| <i>ID2</i>        | F: gagtctgctacaacatgaacgac<br>R: ctgcaaggacaggatgctgatg  |
| <i>Actin</i>      | F: ccagagcaagagaggtatcc<br>R: ctgtggtggtgaacgctgtag      |

**Table S1**

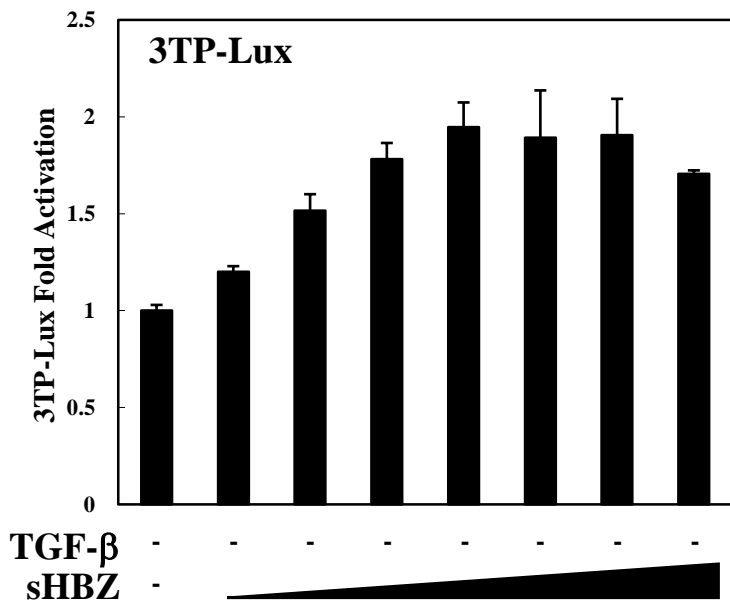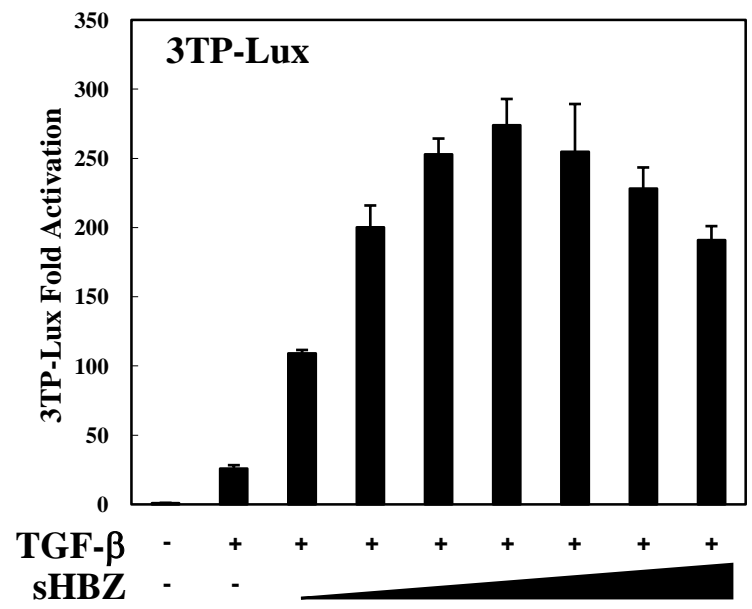

**Figure S1**

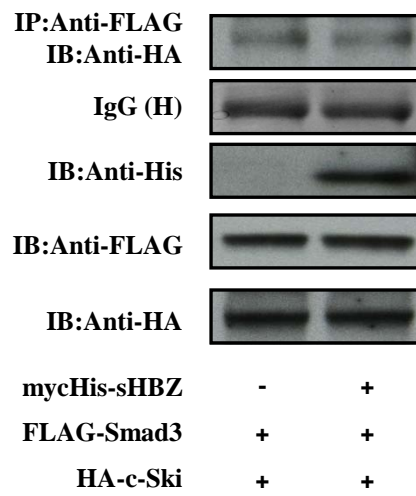

**Figure S2**

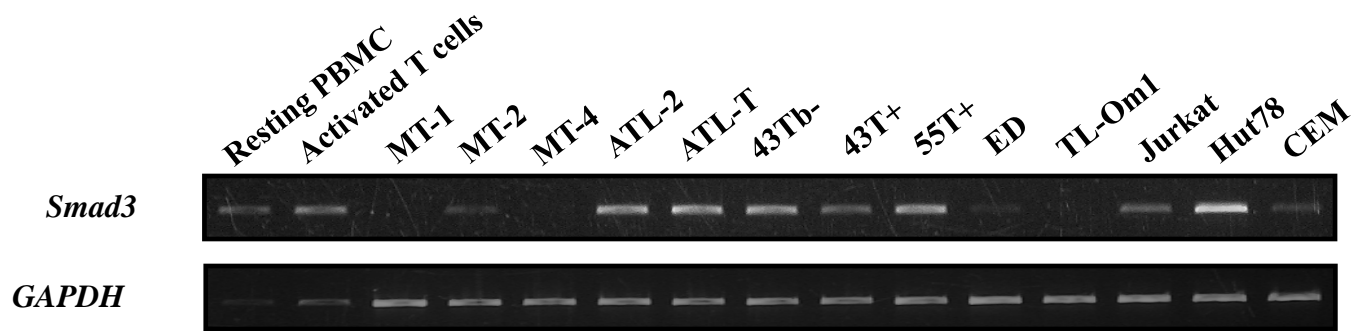

**Figure S3**

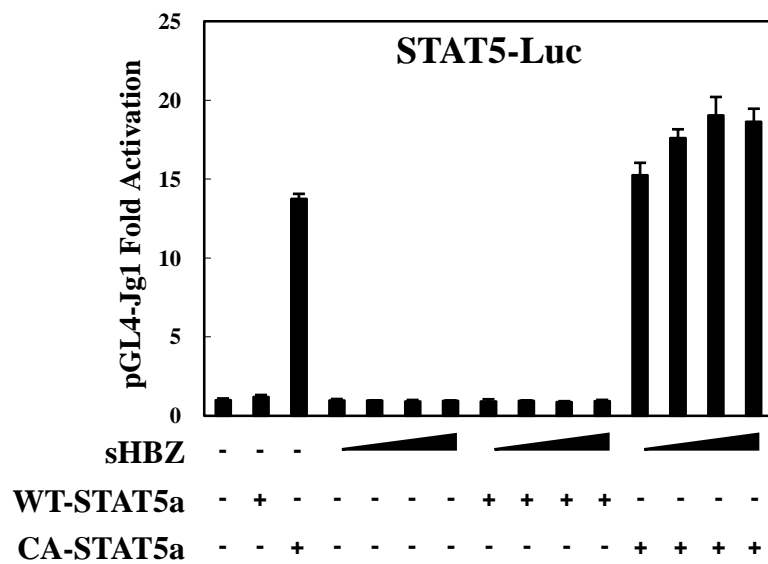

**Figure S4**
